# Supplementary material for: Broadband dielectric spectroscopy of micelles and microemulsions formed in a hydrophilic ionic liquid: the relaxation mechanism and interior parameters
Source: Royal Society of Chemistry journal article supplement (doi:10.1039/c7nj04813k), 2018-01-01
Supplement: c7nj04813k1.pdf [file c7nj04813k1.pdf]

## Supporting Information

Broadband Dielectric Spectroscopy of Micelles and Microemulsions Formed in a Hydrophilic  
Ionic Liquid: Relaxation Mechanism and Interior Parameters

*AUTHOR NAMES.* Yiwei Lian<sup>2</sup>, Kongshuang Zhao\*<sup>1</sup>

*AUTHOR ADDRESS.* <sup>1</sup>College of Chemistry, Beijing Normal University, Beijing 100875,  
China. E-mail: zhaoks@bnu.edu.cn; Tel: +861058805856; <sup>2</sup>Key Laboratory for Resource  
Exploration Research of Hebei Province, College of Materials Science and Engineering, Hebei  
University of Engineering, Handan, Hebei, 056038, China.

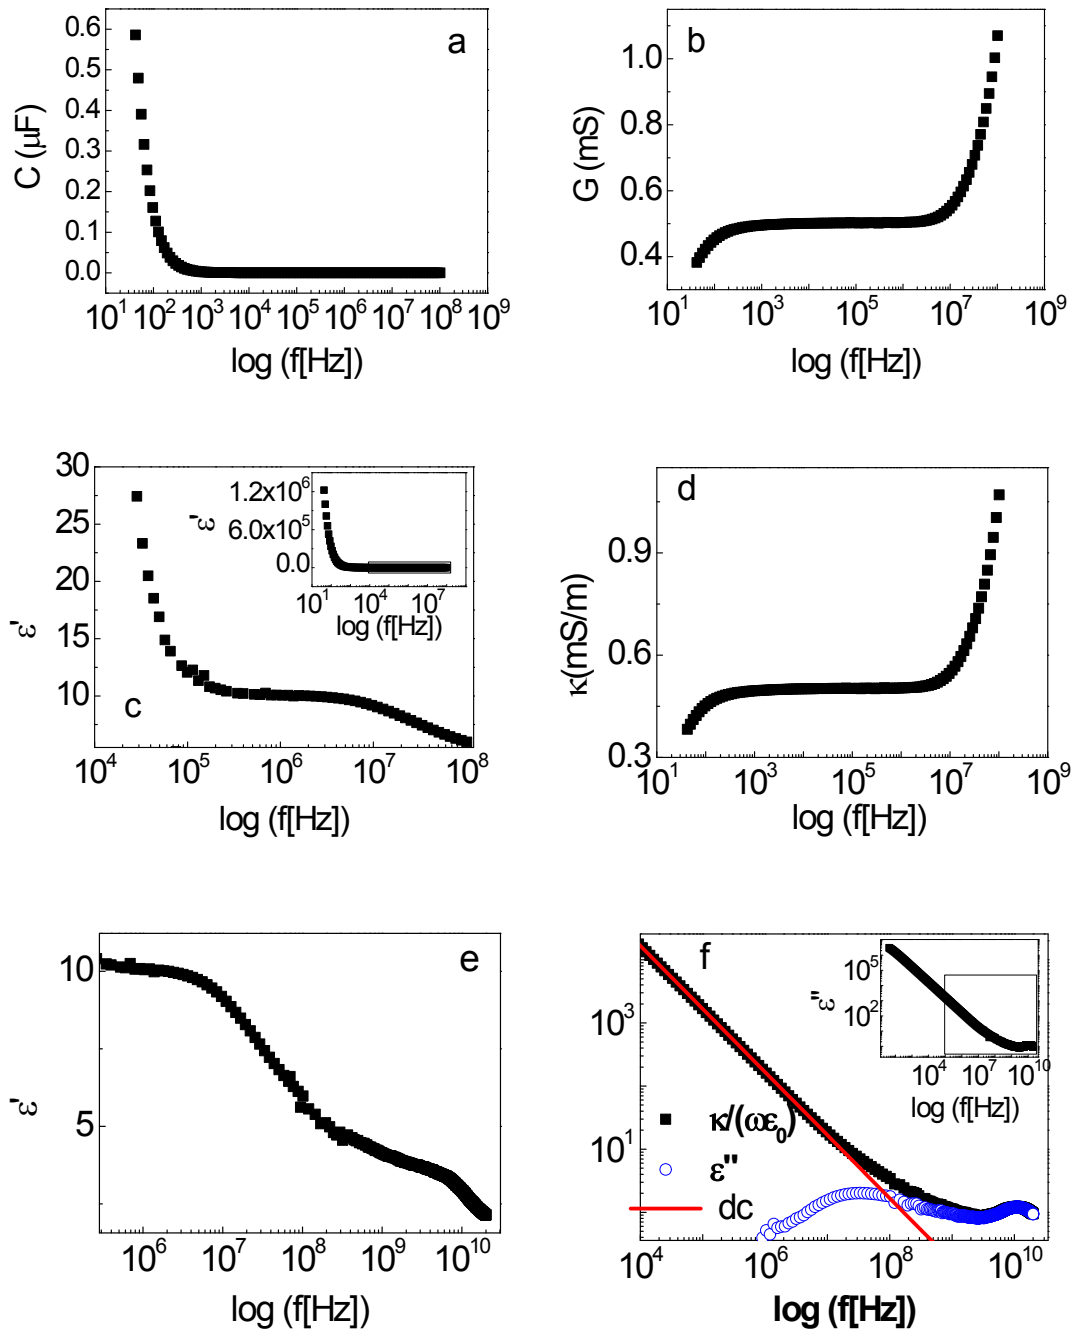

**Figure S1.** An example of the data in the whole measured frequency range: The directly measured (a) capacitance and (b) conductance, transferred data (c) dielectric constant and (d) conductivity in the whole measured range of low-frequency measuring instrument (40Hz-110MHz); (e) and the insert of (f) are the dielectric constant and dielectric loss in the whole measured frequency range.

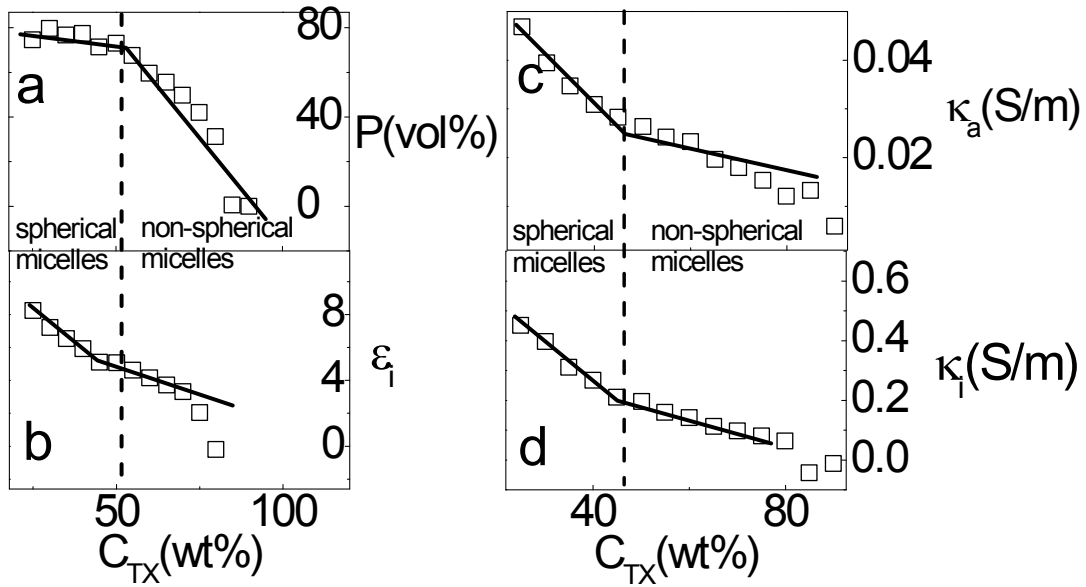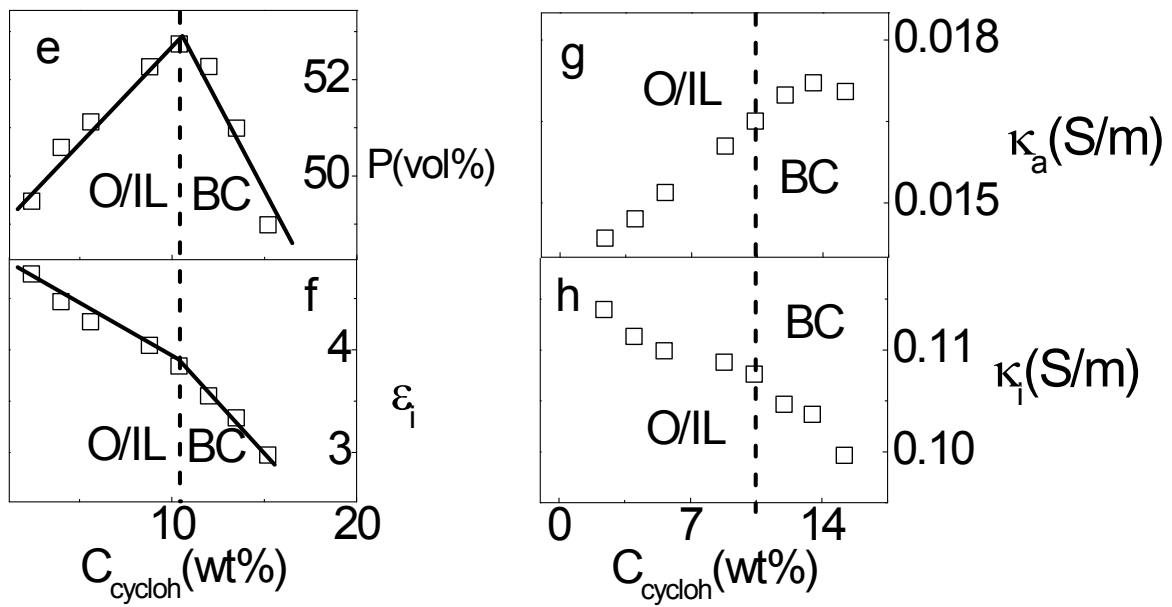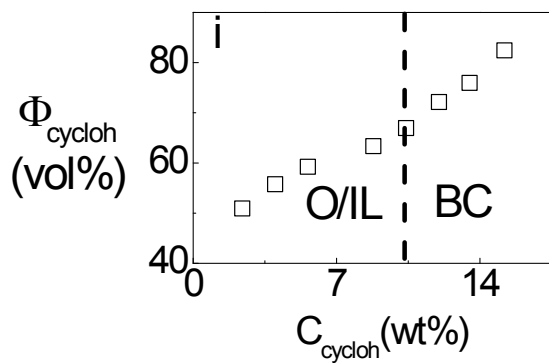

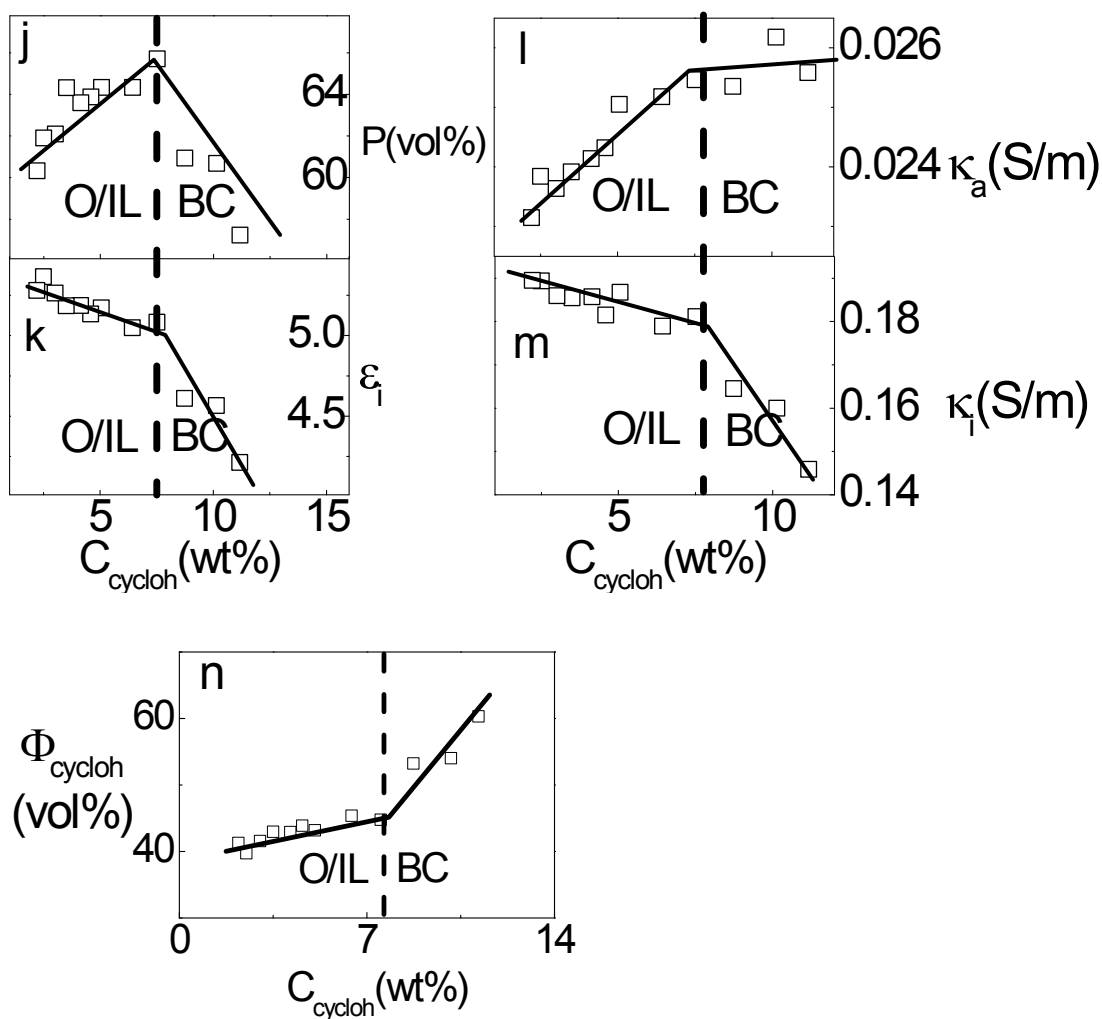

**Figure S2.** Phase parameters of non-spherical micelles and B.C. sub-region: (a)-(d) non-spherical micelles; (e)-(i) B.C. sub-region in the experiment path of IL-based microemulsion with a fixed weight ratio of IL/TX-100; (j)-(n) B.C. sub-regions in the experiment path of IL-based microemulsion with a fixed weight fraction of TX-100.
